# Supplementary material for: Oxidative Stress in Cells with Extra Centrosomes Drives Non-Cell-Autonomous Invasion
Source: Dev Cell. 2018 Nov 19;47(4):409–424.e9. doi: 10.1016/j.devcel.2018.10.026 (PMC6251975; doi:10.1016/j.devcel.2018.10.026)
Supplement: Document S1. Figures S1–S7 and Tables S1, S6, and S7 [file mmc1.pdf]

**Developmental Cell, Volume 47**

## **Supplemental Information**

### **Oxidative Stress in Cells with Extra Centrosomes**

#### **Drives Non-Cell-Autonomous Invasion**

**Teresa Arnandis, Pedro Monteiro, Sophie D. Adams, Victoria Louise Bridgeman, Vinothini Rajeeve, Emanuela Gadaleta, Jacek Marzec, Claude Chelala, Ilaria Malanchi, Pedro R. Cutillas, and Susana A. Godinho**

Figure S1

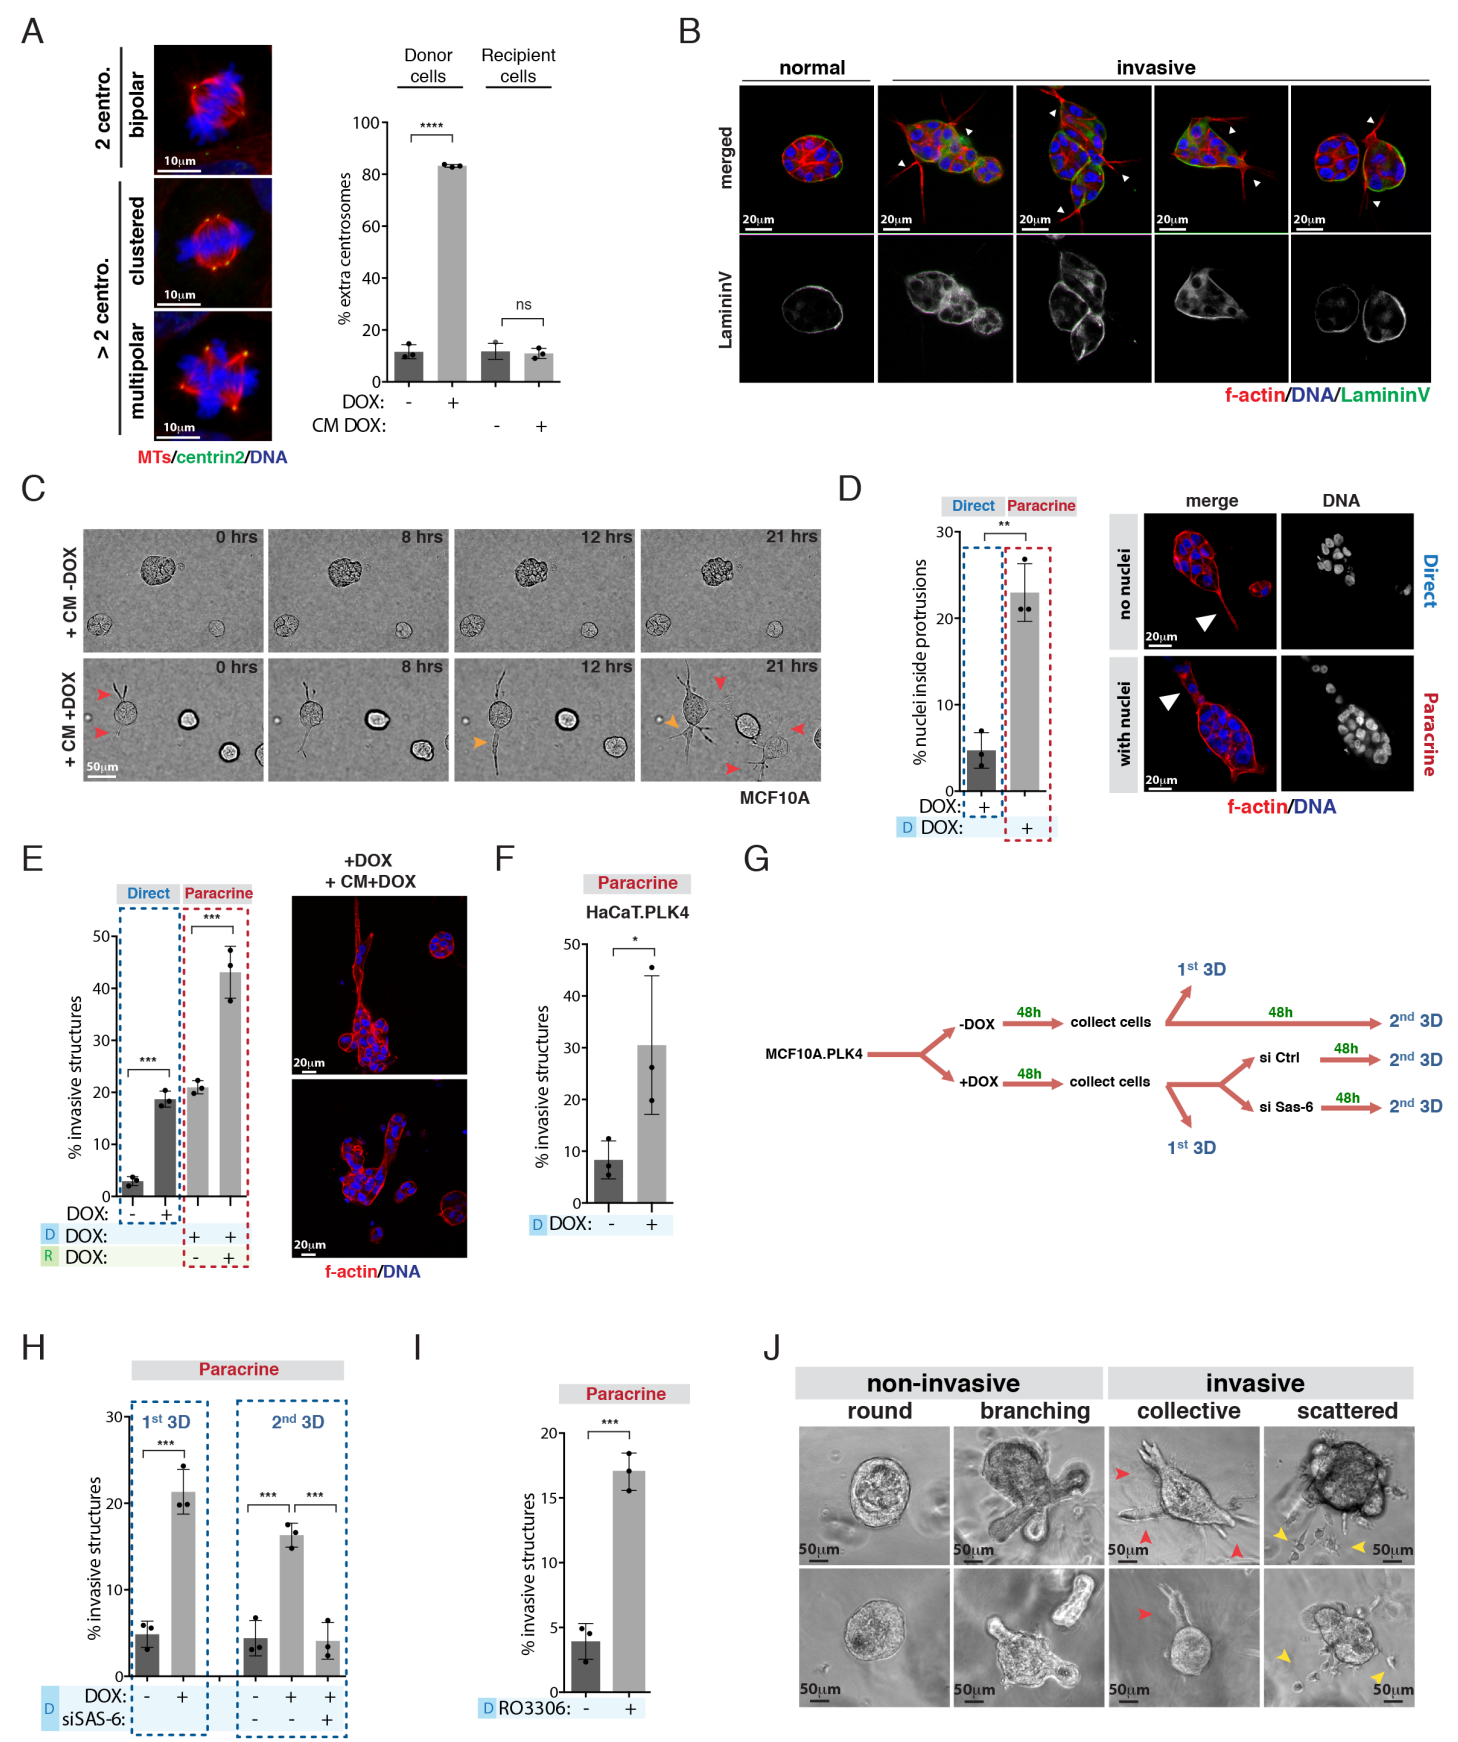

**Figure S1. Centrosome amplification induces paracrine invasion. Related to Figure 1, Table S1, Videos S3 and S4.** (A) Left, Cells in mitosis with normal and amplified centrosomes (>2 centro.; clustered + multipolar) were stained for microtubules (MTs) ( $\alpha$ -Tubulin, red), centrioles (centrin2, green) and DNA (blue). Scale bar 10 $\mu$ m. Right, Centrosome amplification in cells with extra centrosomes (+DOX) or incubated with CM collected from cells with extra centrosomes (CM+DOX). (B) Normal and invasive 3D acini stained for f-actin (phalloidin, red), laminin V (green) and DNA (blue). White arrowheads indicate invasive protrusions. Scale bar 20 $\mu$ m. (C) Still images from live cell imaging of acini incubated with CM (CM-/ +DOX). Red arrowheads indicate invasive acini and orange arrowhead indicates a cell/nuclei moving through the invasive protrusion. Scale bar 20 $\mu$ m (D) Left, Quantification of acini with invasive protrusions containing nuclei in cells with extra centrosomes (+DOX) or incubated with CM (CM-/ +DOX). Right, Invasive acini stained for f-actin (phalloidin, red) and DNA (blue). Arrowheads indicate invasive protrusions. Scale bar 20 $\mu$ m. (E) Left, Quantification of invasive structures in acini with extra centrosomes (+DOX) and incubated with CM+DOX. Right, Highly invasive/disrupted acini observed in cells with extra centrosomes treated with CM+DOX. Cells were stained for f-actin (phalloidin, red) and DNA (blue). Scale bar 20 $\mu$ m. (F) Quantification of invasive acini incubated with CM from HaCaT.PLK4 cells. (G) Schematic representation of SAS-6 depletion to revert centrosome amplification. (H) Quantification of invasive acini incubated with CM from cells where centrosome amplification was lost (SAS-6 siRNA). (I) Invasive acini in cells incubated with CM collected from cells treated with the CDK1 inhibitor RO-3306 (5 $\mu$ M, 40 hrs). (J) Bright field images of non-invasive and invasive mouse mammary organoids. Scale bar 50 $\mu$ m. For all graphics error bars represent mean  $\pm$  SD from three independent experiments. \* $P < 0.05$ , \*\* $P < 0.01$ , \*\*\* $P < 0.001$ , \*\*\*\* $P < 0.0001$ , ns not significant.

Figure S2

A

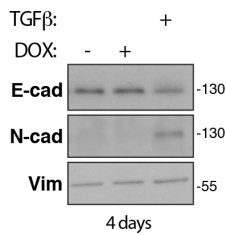

B

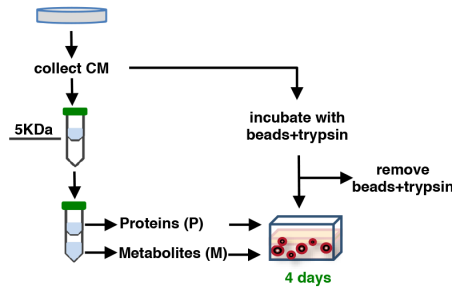

C

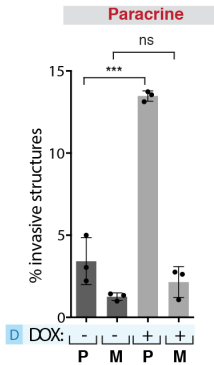

D

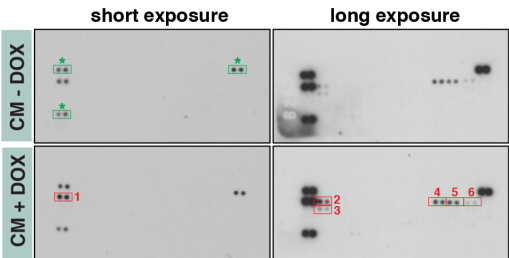

E

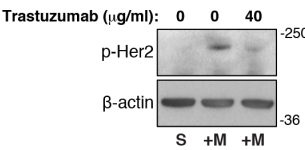

F

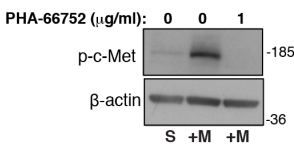

G

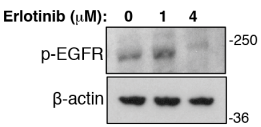

H

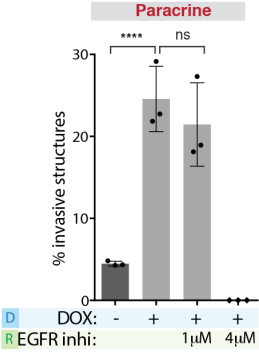

I

| MCF10A.PLK4 - DOX |                      |                    |                 |            |            |
|-------------------|----------------------|--------------------|-----------------|------------|------------|
| sample            | Initial cell #       | Final cell #       | Protein (mg/ml) | LDH (fold) | % invasion |
| 1                 | 33.5e10 <sup>5</sup> | 26e10 <sup>6</sup> | 16.58           | 1.0        | 3.36       |
| 2                 | 33.5e10 <sup>5</sup> | 26e10 <sup>6</sup> | 16.01           | 1.0        | 3.24       |
| 3                 | 33.5e10 <sup>5</sup> | 26e10 <sup>6</sup> | 17.86           | 0.9        | 4.79       |

| MCF10A.PLK4 + DOX |                      |                    |                 |            |            |
|-------------------|----------------------|--------------------|-----------------|------------|------------|
| sample            | Initial cell #       | Final cell #       | Protein (mg/ml) | LDH (fold) | % invasion |
| 1                 | 45.2e10 <sup>5</sup> | 20e10 <sup>6</sup> | 19.11           | 1.1        | 15.91      |
| 2                 | 45.2e10 <sup>5</sup> | 20e10 <sup>6</sup> | 19.24           | 1.2        | 17.45      |
| 3                 | 45.2e10 <sup>5</sup> | 20e10 <sup>6</sup> | 20.63           | 1.3        | 17.67      |

J

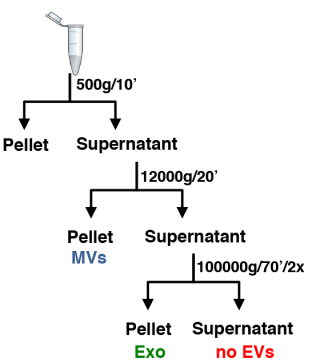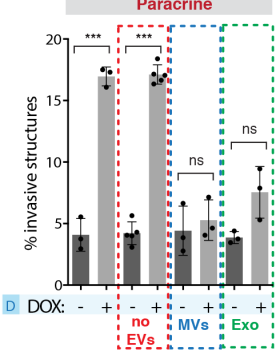

K

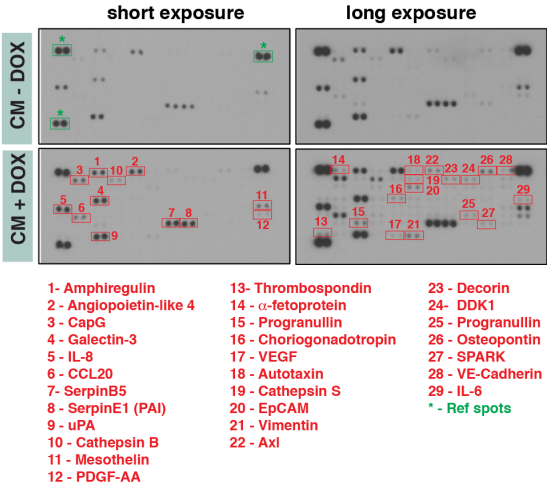

**Figure S2. Proteins secreted by cells with extra centrosomes promote paracrine invasion via RTK activation. Related to Figure 2.** (A) Levels of E-cadherin, N-cadherin and Vimentin in cells incubated with CM for 4 days. TGF- $\beta$  treatment (5 ng/ml, 4 days) was used as positive control. (B) Schematic representation of Vivaspin filtration and trypsin incubation. (C) Quantification of invasive acini cells incubated with CM after Vivaspin filtration. P: proteins, M: metabolites. (D) phospho-RTK array obtained from cells incubated with CM. (E) phospho-Her2 levels in cells treated with 40  $\mu$ g/ml of Trastuzumab (Her2 inhibitor) for 1 hr. S, serum starved; +M, plus fresh medium. (F) phospho-c-Met levels in cells treated with 1  $\mu$ M PHA-66752 (c-Met inhibitor) for 1 hr. S, serum starved; +M, plus fresh medium. (G) phospho-EGFR levels in cells treated with different concentrations of Erlotinib (1 and 4  $\mu$ M, 24 hrs). (H) Left, Quantification of invasive acini cells treated with EGFR inhibitor (Erlotinib, 1 and 4  $\mu$ M) and incubated with CM. Right, Acinar structures. Red arrowheads indicate invasive acini. Scale bar 40 $\mu$ m. (I) Table summarising the conditions used to prepare CM for proteomic analysis. Cells with (+DOX) or without extra centrosomes (-DOX) were plated at different densities to ensure a similar cell number by the time of CM collection. Protein concentration and invasive capacity of the CM was assessed in all samples. (J) Left, Schematic representation of the ultracentrifugation method to isolate MVs and Exo. Right, Quantification of invasive acini in cells incubated with CM with and without MVs/Exo. (K) Human XL Oncology Array incubated with CM collected from cells with (CM+DOX) and without (CM-DOX) extra centrosomes. For all graphics error bars represent mean  $\pm$  SD from three independent experiments. \*\*\* $P < 0.001$ , \*\*\*\* $P < 0.0001$ , ns not significant.

Figure S3

A

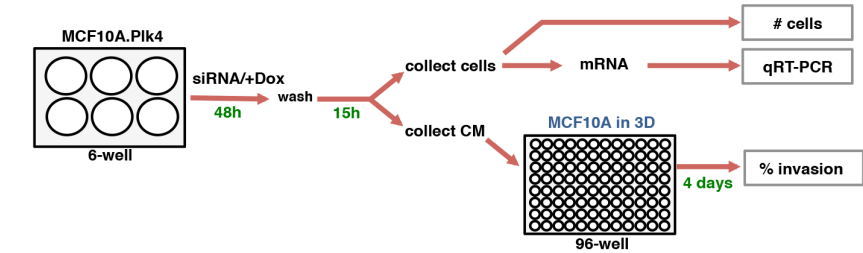

B

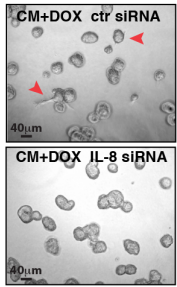

C

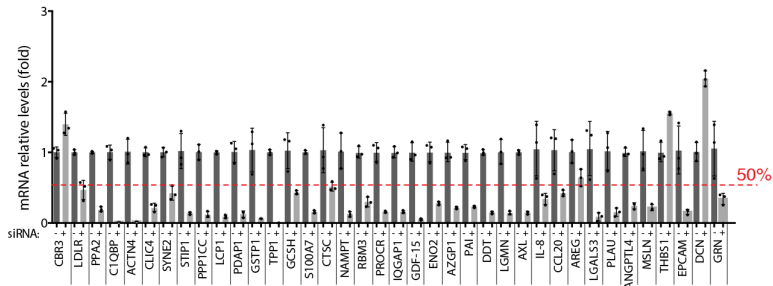

E

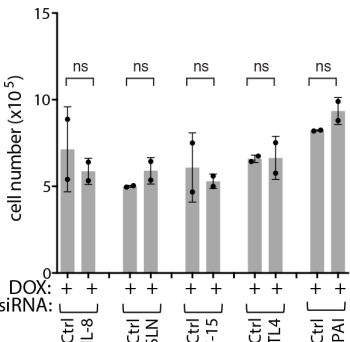

D

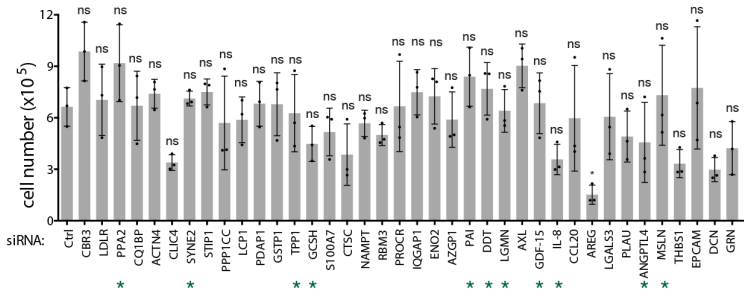

**Figure S3. siRNA screen identified secreted pro-invasive factors in MCF10A cells with extra centrosomes. Related to Figure 3 and Table S1.** (A) Schematic representation of the siRNA screen set-up. (B) Acini images from 96-well plate siRNA screen. Scale bar 40 $\mu$ m. (C) mRNA levels for all the siRNA conditions to assess depletion efficiency. Red dashed line represents 50% reduction of mRNA levels. (D) Cell number upon siRNA treatment to assess the impact of the different conditions on cell proliferation/viability. Green asterisks depict the positive screen hits shown in Figure 3F. (E) Cell number in cells with extra centrosomes (+DOX) upon siRNA depletion of some of our positive hits. For all graphics error bars represent mean  $\pm$  SD from three independent experiments. \* $P < 0.05$ , ns not significant.

Figure S4

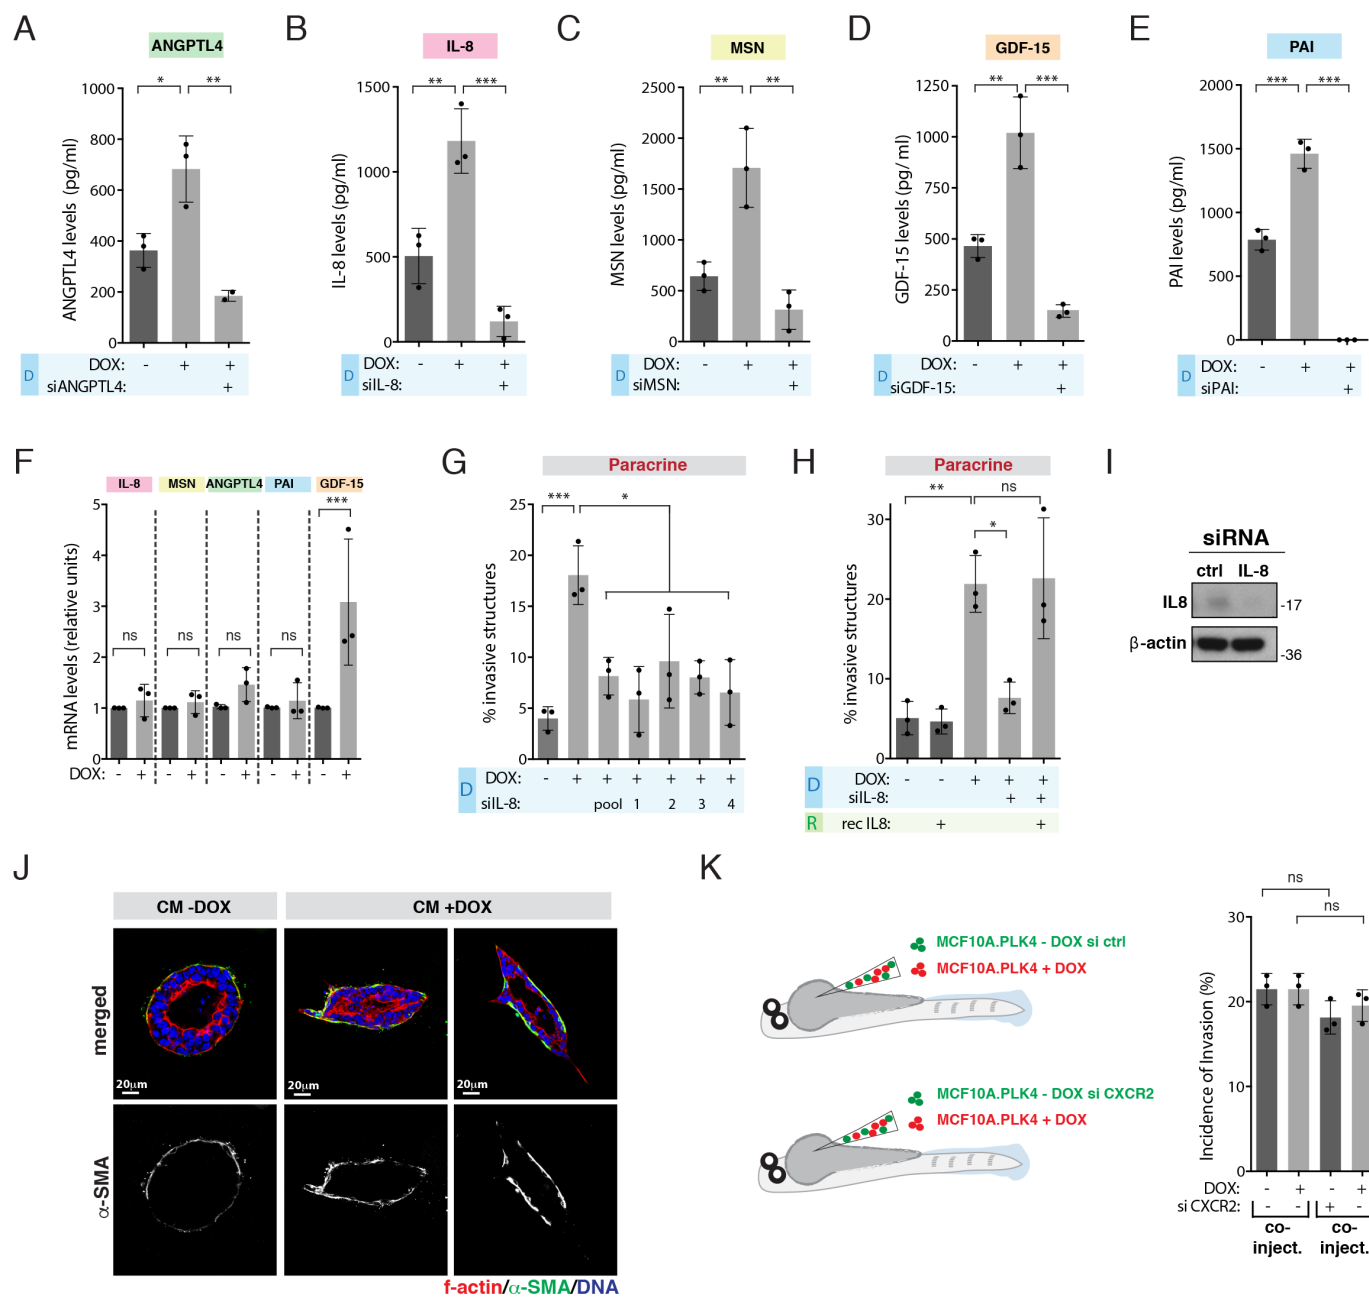

**Figure S4. Validation of the positive hits identified in the siRNA screen. Related to Figure 4.** (A) Levels of secreted ANGPTL4. (B) Levels of secreted IL-8. (C) Levels of secreted MSN. (D) Levels of secreted GDF-15. (E) Levels of secreted PAI. (F) mRNA levels of the different pro-invasive factors after induction of centrosome amplification (48 hrs). (G) Quantification of invasive structures in acini incubated with CM collected from cells depleted of IL-8 (siRNA pool and individual sequences). (H) Quantification of invasive structures in acini incubated with CM collected from cells depleted of IL-8 and supplemented with recombinant IL-8 (0.5 µg/ml). (I) IL-8 levels after siRNA depletion. (J) Non-invasive and invasive mammary organoids from WT mice stained for f-actin (phalloidin, red),  $\alpha$ -SMA (green) and DNA (blue). Scale bar 20µm. (K) Left, Schematic representation of the zebrafish co-injections. Right, Quantification of the incidence of invasion in the co-injection experiments (-DOX/+DOX) when CXCR2 is depleted in cells with normal centrosomes (-DOX). Number of injected fish co-injection control siRNA=71; co-injection CXCR2 siRNA=121. For all graphics error bars represent mean +/- SD from three independent experiments. \* $P < 0.05$ , \*\* $P < 0.01$ , \*\*\* $P < 0.001$ , ns not significant.

Figure S5

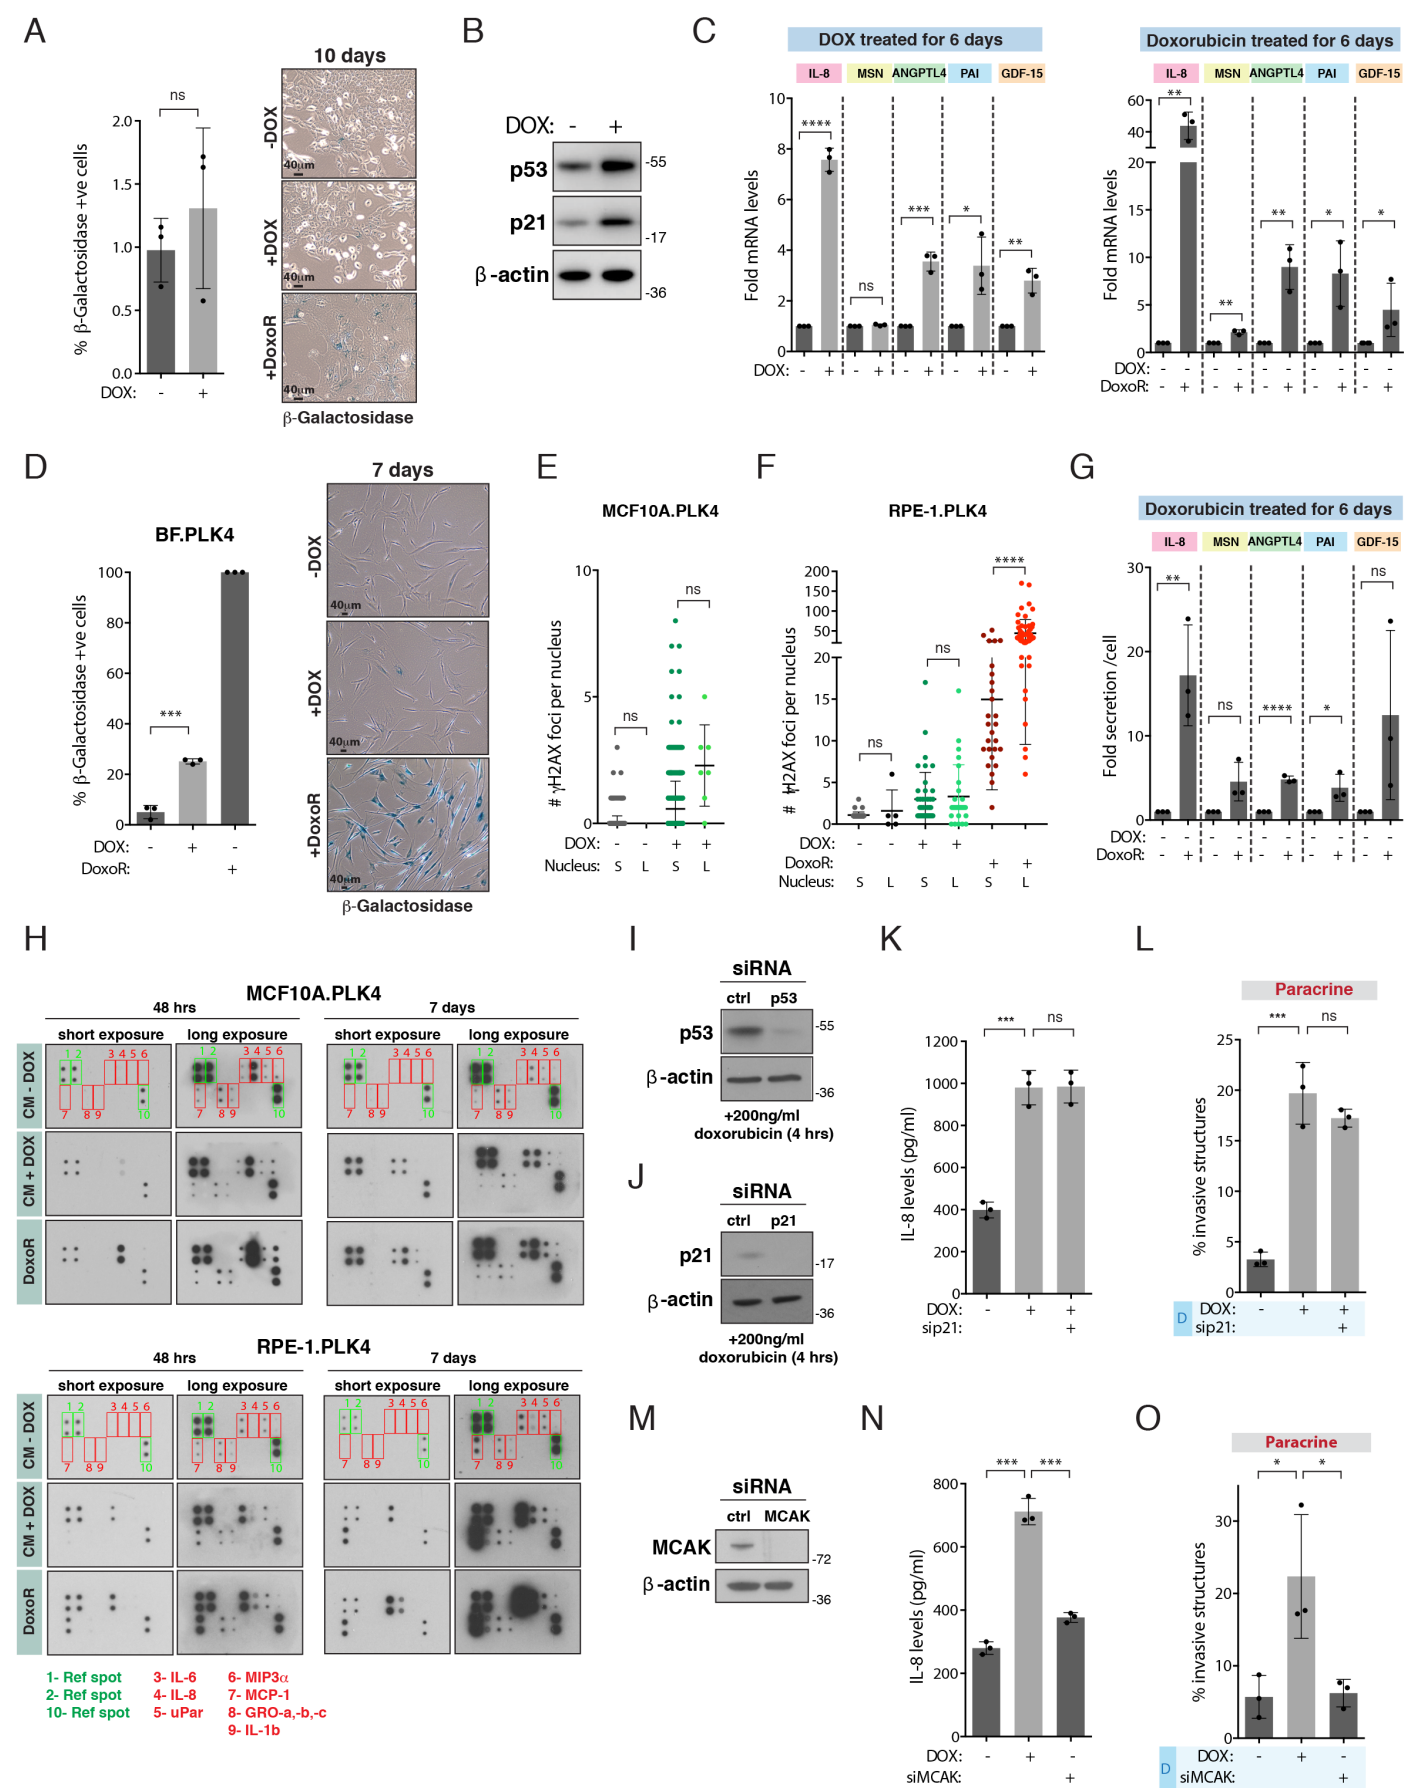

**Figure S5. Secretion of pro-invasive factors in cells with extra centrosomes does not require a full senescence response and is not a consequence of aneuploidy. Related to Figure 5 and Table S1.** (A) Left, Quantification of  $\beta$ -galactosidase positive MCF10A.PLK4 cells after induction of centrosome amplification for 10 days. Right, Images representing cells stained for  $\beta$ -galactosidase (blue). Scale bar 40 $\mu$ m. (B) Levels of p53 and p21 after induction of extra centrosomes (48 hrs). (C) mRNA levels of the different pro-invasive factors 6 days after induction of centrosome amplification (Left) or Doxorubicin treatment (Right). (D) Left, Quantification of  $\beta$ -galactosidase positive BF.PLK4 cells 7 days after induction of centrosome amplification or doxorubicin treatment (100 ng/ml). Right, Cells stained for  $\beta$ -galactosidase (blue). Scale bar 40 $\mu$ m. (E) Quantification of  $\gamma$ H2AX foci in MCF10A cells with extra centrosomes after 7days. (F) Quantification of  $\gamma$ H2AX foci in RPE-1 cells with extra centrosomes after 7days. DoxoR-induced senescent cells were used as positive control. L, large nuclei; S, small nuclei. Data as seen in Fig. 5f. (G) Quantification of secreted pro-invasive factors in senescent cells treated with DoxoR after 6 days. (H) SASP array incubated with CM collected from cells with (CM+DOX) and without (CM-DOX) extra centrosomes. DoxoR-induced senescent cells were used as positive control. (I) Levels of p53 after p53 siRNA. (J) Levels of p21 after p21 siRNA. (K) Levels of secreted IL-8 in cells depleted of p21. (L) Quantification of invasive structures in acini incubated with CM collected from cells depleted of p21. (M) Levels of MCAK after MCAK siRNA depletion. (N) Levels of secreted IL-8 in cells depleted of MCAK. (O) Quantification of invasive structures in acini incubated with CM collected from cells depleted of MCAK. For all graphics error bars represent mean  $\pm$  SD from three independent experiments. \* $P < 0.05$ , \*\* $P < 0.01$ , \*\*\* $P < 0.001$ , \*\*\*\* $P < 0.0001$ , ns not significant.

Figure S6

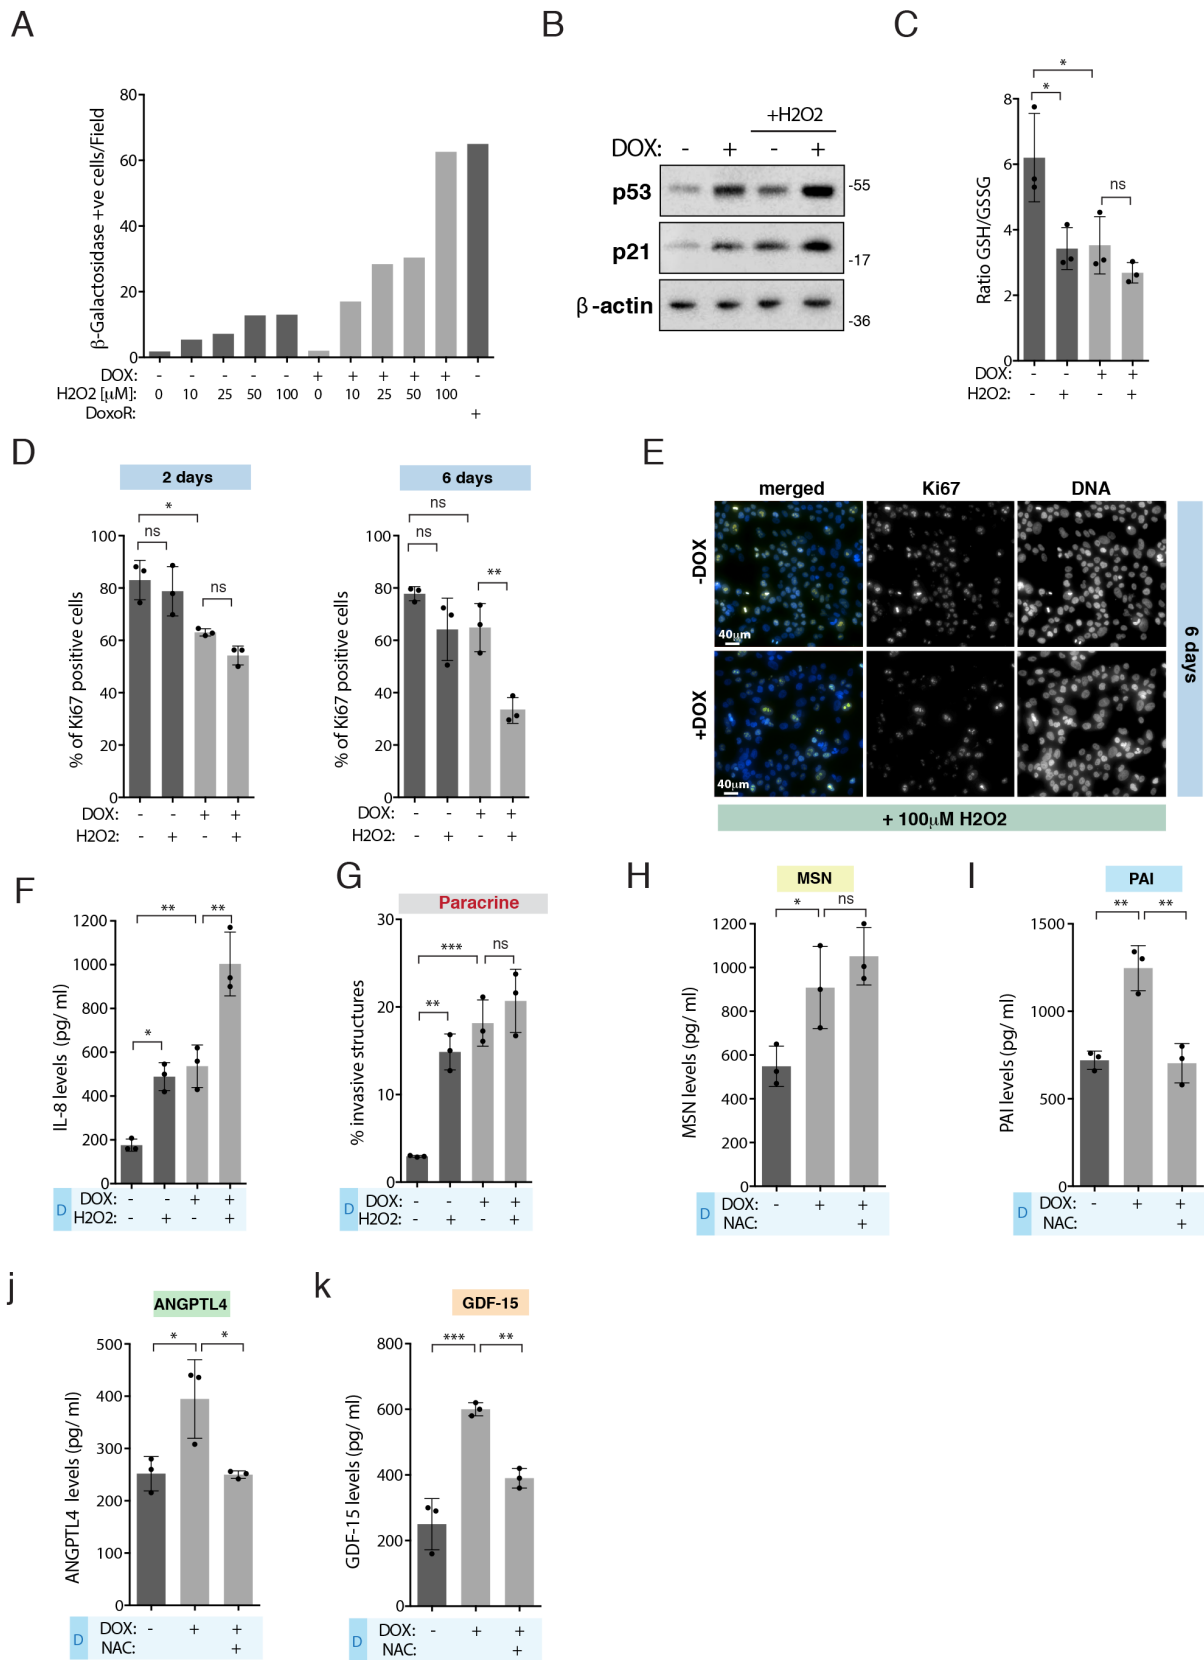

**Figure S6. Increased ROS levels in cells with extra centrosomes promote secretion and paracrine invasion. Related to Figure 6 and Table S1.** (A) Quantification of  $\beta$ -galactosidase positive MCF10A.PLK4 cells after 6 days, before and after 48 hrs treatment with DOX and treated with different doses of H<sub>2</sub>O<sub>2</sub> for 48 hrs. (B) Levels of p53 and p21 in cells with (+DOX) and without (-DOX) extra centrosomes treated with H<sub>2</sub>O<sub>2</sub> (100  $\mu$ M). (C) Ratio of GSH/GSSG in cells after induction of extra centrosomes (48 hrs) and H<sub>2</sub>O<sub>2</sub> (100  $\mu$ M) treatment. (D) Quantification of Ki67 positive cells 2 and 6 days after induction of centrosome amplification and H<sub>2</sub>O<sub>2</sub> (100  $\mu$ M) treatment. (E) Cells stained for Ki67 (green) and DNA (blue). Scale bar 40 $\mu$ m. (F) Levels of secreted IL-8 in cells with (+DOX) and without (-DOX) extra centrosomes treated with H<sub>2</sub>O<sub>2</sub> (100  $\mu$ M, 48 hrs). (G) Quantification of invasive structures in acini incubated with CM collected from cells with (+DOX) and without (-DOX) extra centrosomes treated with H<sub>2</sub>O<sub>2</sub> (100  $\mu$ M). (H) Levels of secreted MSN after NAC treatment (5 mM, 48 hrs). (I) Levels of secreted PAI after NAC treatment (5 mM, 48 hrs). (J) Levels of secreted ANGPTL4 after NAC treatment (5 mM, 48 hrs). (K) Levels of secreted GDF-15 after NAC treatment (5 mM, 48 hrs). For all graphics error bars represent mean  $\pm$  SD from three independent experiments. \* $P < 0.05$ , \*\* $P < 0.01$ , \*\*\* $P < 0.001$ , ns not significant.

Figure S7

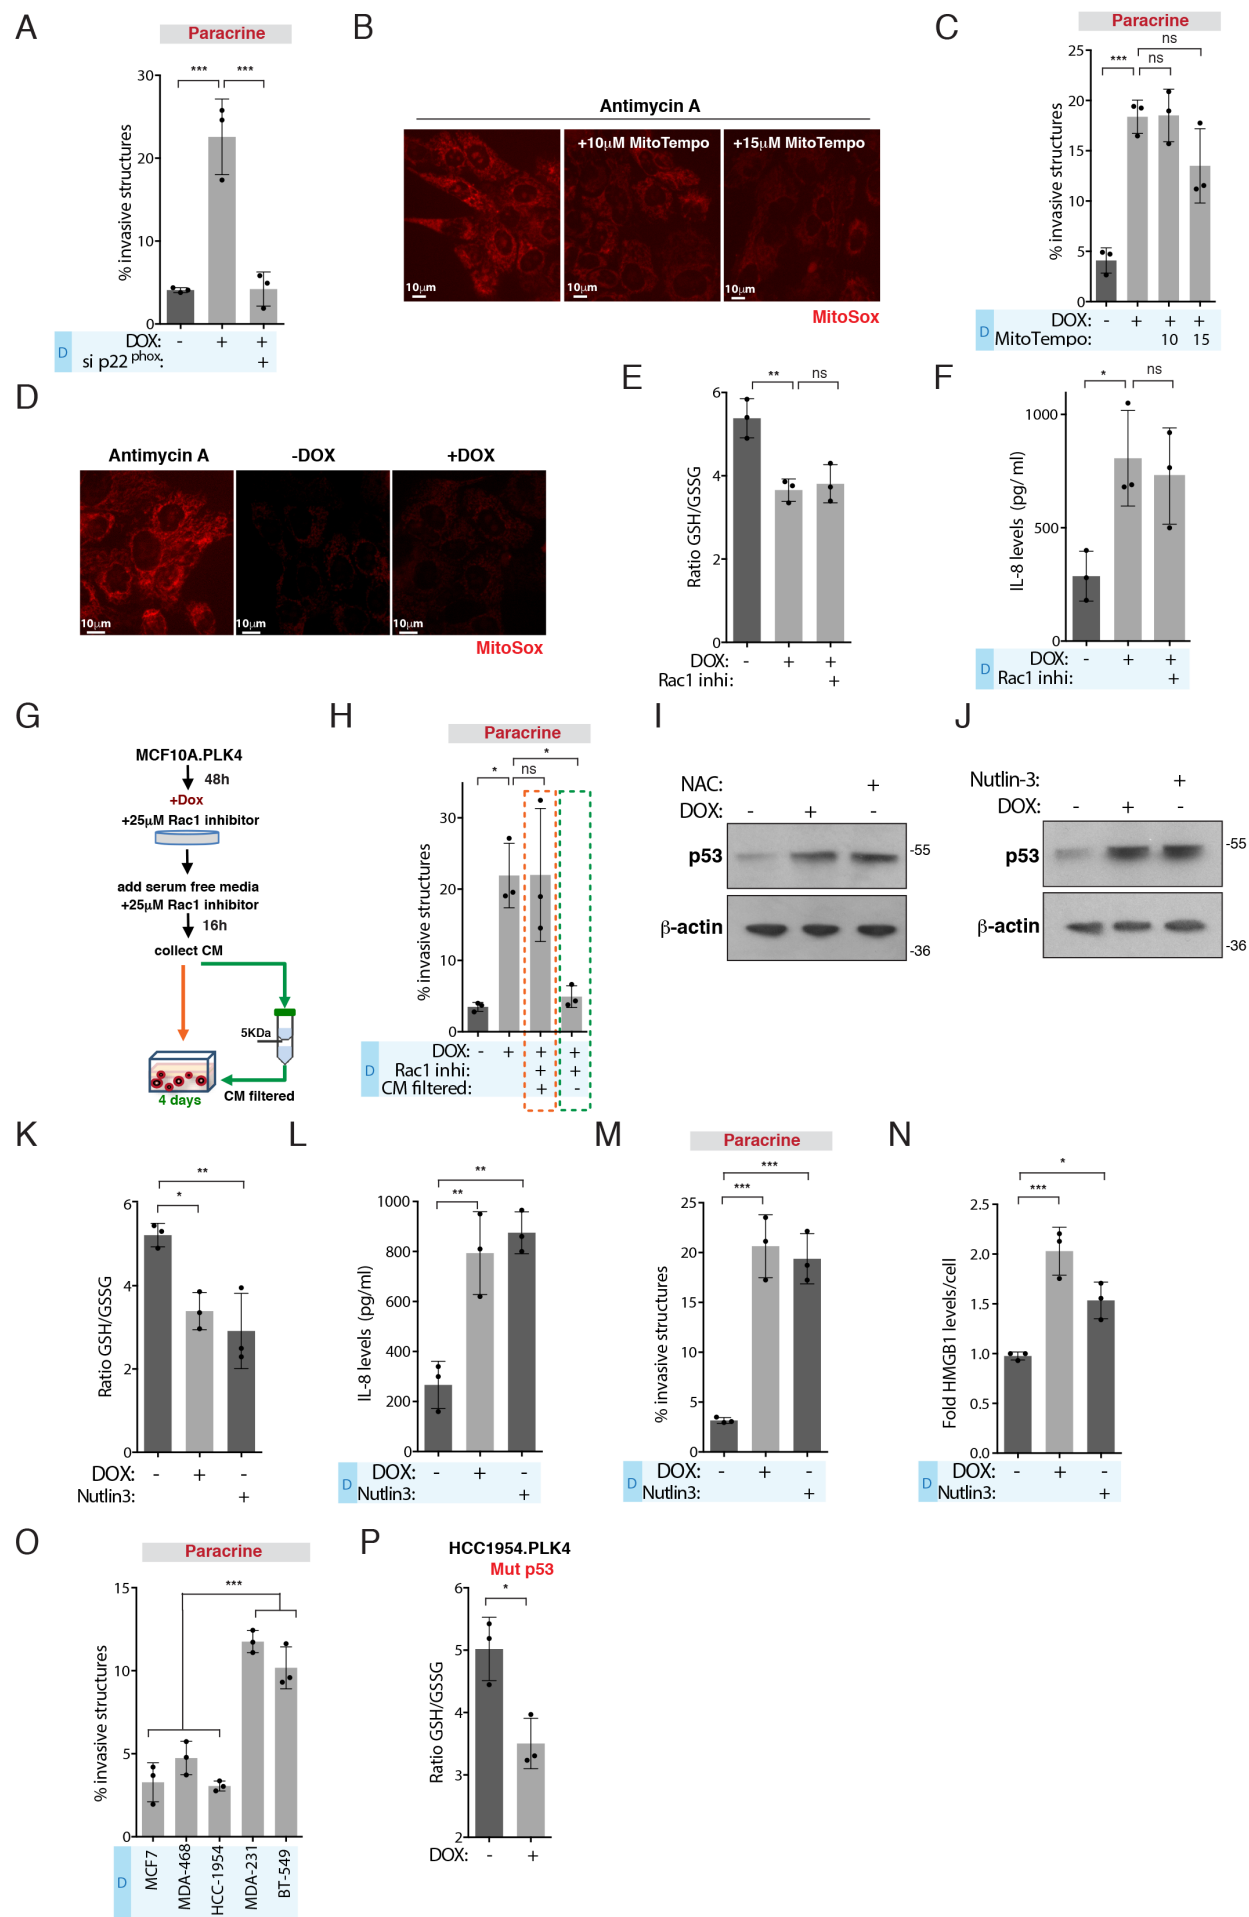

**Figure S7. p53-mediated ROS production promotes secretion and paracrine invasion in cells with extra centrosomes.**

**Related to Figure 7 and Table S1.** (A) Quantification of invasive structures in acini incubated with CM collected from cells depleted of p22<sup>phox</sup>. (B) Cells treated with Antimycin A (35  $\mu$ M) to increase mitochondrial ROS and stained with fluorogenic dye MitoSox (red). MitoTempo was used to inhibit mitochondrial ROS (10 and 15  $\mu$ M, 48 hrs). Scale bar 10 $\mu$ m. (C) Quantification of invasive structures in acini incubated with CM collected from cells with extra centrosomes treated with MitoTempo (10 and 15  $\mu$ M, 48 hrs). (D) Cells were stained with MitoSox (red). Scale bar 10 $\mu$ m. (E) Ratio of GSH/GSSG in cells after induction of extra centrosomes (48 hrs) and treated with RAC1 inhibitor (NSC23766, 25  $\mu$ M, 48 hrs). (F) Levels of secreted IL-8 in cells with (+DOX) and without (-DOX) extra centrosomes treated with RAC1 inhibitor (25  $\mu$ M, 48 hrs). (G) Schematic representation of the experimental setting to remove RAC1 inhibitor from the CM before adding on 3D cultures. (H) Quantification of invasive structures in acini incubated with CM collected from cells treated with RAC1 inhibitor (25  $\mu$ M) before and after removal of the drug (CM filtered). (I) p53 levels in cells with extra centrosomes (+DOX) and treated with NAC (5 mM, 48 hrs). (J) Western blot analysis of p53 levels in cells treated with Nutlin-3 (5 mM, 48 hrs). (K) Ratio of GSH/GSSG in cells treated with Nutlin-3 (5 mM, 48 hrs). (L) Levels of secreted IL-8 in cells treated with Nutlin-3 (5 mM, 48 hrs). (M) Quantification of invasive structures in acini incubated with CM collected from cells treated Nutlin-3 (5 mM, 48 hrs). (N) Levels of secreted HMGB1 in cells treated with Nutlin-3 (5 mM, 48 hrs). (O) Quantification of invasive structures in acini incubated with CM collected from breast cancer cell lines with low and high centrosome amplification. (P) Ratio of GSH/GSSG in HCC1954.PLK4 cells after induction of extra centrosomes (+DOX) for 48 hrs. For all graphics error bars represent mean  $\pm$  SD from three independent experiments. \* $P < 0.05$ , \*\* $P < 0.01$ , \*\*\* $P < 0.001$ , ns not significant.

**Table S1:** Quantification of the percentage of extra centrosomes in the different conditions and cell lines. Related to Figures 1, 3, 5, 6, 7, S1, S3, S5, S6 and S7.

| Cell line       | Treatment(s)            | % Centrosome amplification |
|-----------------|-------------------------|----------------------------|
| MCF10A.PLK4     | n/a*                    | 12                         |
| MCF10A.PLK4     | DOX                     | 87                         |
| MCF10A.PLK4-608 | DOX                     | 11                         |
| MCF10A.PLK4     | after DOX + siRNA ctr   | 42                         |
| MCF10A.PLK4     | after DOX + siRNA SAS-6 | 18                         |
| HaCat.PLK4      | n/a*                    | 21                         |
| HaCaT.PLK4      | DOX                     | 73                         |
| MCF10A          | RO-3306                 | 58                         |
| MCF10A.PLK4     | DOX + siRNA IL-8        | 66                         |
| MCF10A.PLK4     | DOX + siRNA ANGPTL4     | 78                         |
| MCF10A.PLK4     | DOX + siRNA GDF15       | 65                         |
| MCF10A.PLK4     | DOX + siRNA PAI         | 71                         |
| MCF10A.PLK4     | DOX + siRNA MSN         | 61                         |
| MCF10A.PLK4     | DOX + siRNA p53         | 64                         |
| MCF10A.PLK4     | DOX + siRNA p21         | 65                         |
| MCF10A.PLK4     | DOX 6 days              | 39                         |
| MCF10A.PLK4     | DOX + NAC               | 87                         |
| MCF10A.PLK4     | DOX + Apocynin          | 93                         |
| MCF10A          | Nutlin-3                | 8                          |
| MCF10A.PLK4     | DOX + Rac inhibitor     | 82                         |
| MCF10A.PLK4     | H2O2                    | 8                          |
| MCF10A.PLK4     | DOX + H2O2              | 46                         |
| MCF7. PLk4      | n/a*                    | 18                         |
| MCF7. PLk4      | DOX                     | 57                         |
| HCC1954.PLK4    | n/a*                    | 16                         |
| HCC1954. PLK4   | DOX                     | 82                         |
| BF.PLK4         | n/a*                    | 1                          |
| BF.PLK4         | DOX                     | 44                         |
| RPE.PLK4        | n/a*                    | 15                         |
| RPE.PLK4        | DOX                     | 80                         |
|                 |                         |                            |

\* n/a: not applicable, no treatment performed

**Supplementary Table 6:** References for all siRNAs used. Related to Figures 3 and S3.

| Gene symbol | Reference   | Company   |
|-------------|-------------|-----------|
| CXCL8       | M-004756-00 | Dharmacon |
| CCL20       | M-007832-01 | Dharmacon |
| AREG        | M-017435-00 | Dharmacon |
| LGALS3      | M-010606-02 | Dharmacon |
| PLAU        | M-006000-02 | Dharmacon |
| ANGPTL4     | M-007807-02 | Dharmacon |
| MSLN        | M-006346-02 | Dharmacon |
| THBS1       | M-019743-01 | Dharmacon |
| EPCAM       | M-004568-03 | Dharmacon |
| DCN         | M-021491-00 | Dharmacon |
| GRN         | M-009285-02 | Dharmacon |
| SYNE2       | D-019259-01 | Dharmacon |
| CBR3        | L-008597-00 | Dharmacon |
| LDLR        | L-011073-00 | Dharmacon |
| PPA2        | L-012348-00 | Dharmacon |
| C1QBP       | L-011225-01 | Dharmacon |
| ACTN4       | L-011988-00 | Dharmacon |
| CLIC4       | L-013553-00 | Dharmacon |
| STIP1       | L-019802-00 | Dharmacon |
| PPP1CC      | L-006827-00 | Dharmacon |
| LCP1        | L-011716-00 | Dharmacon |
| PDAP1       | L-017675-00 | Dharmacon |
| GSTP1       | L-011179-00 | Dharmacon |
| TPP1        | L-005810-00 | Dharmacon |
| GCSH        | L-017907-00 | Dharmacon |
| S100A7      | L-011769-02 | Dharmacon |
| CTSC        | L-005835-00 | Dharmacon |
| NAMPT       | L-004581-00 | Dharmacon |
| RBM3        | L-018969-01 | Dharmacon |
| PROCR       | L-017326-00 | Dharmacon |
| IQGAP1      | L-004694-00 | Dharmacon |
| GDF15       | L-019875-00 | Dharmacon |
| ENO2        | L-009777-00 | Dharmacon |
| AZGP1       | L-012567-01 | Dharmacon |
| SERPINE1    | L-019376-01 | Dharmacon |
| DDT         | L-012201-01 | Dharmacon |
| LGMN        | L-005924-00 | Dharmacon |
| AXL         | L-003104-00 | Dharmacon |
| CEP192      | L-032250-01 | Dharmacon |
| P21         | L-003471-00 | Dharmacon |
| SAS6        | L-019156-01 | Dharmacon |
| P53         | L-003329-00 | Dharmacon |
| CXCR2       | L-005647-00 | Dharmacon |
| CYBA        | L-011020-02 | Dharmacon |
| CONTROL     | 1027310     | Qiagen    |

**Supplementary Table 7:** Primer sequences used in the RT-qPCR. Related to Figures S3, S4 and S5.

| Gene symbol     | Primer Forward 5'-3'   | Primer Reverse 5'-3'   |
|-----------------|------------------------|------------------------|
| <b>GAPDH</b>    | TTAAAAGCAGCCCTGGTGAC   | CTCTGCTCCTCCTGTTTCGAC  |
| <b>CXCL8</b>    | GTTTTTGAAGAGGGCTGAG    | TTTGCTTGAAGTTTCACTGG   |
| <b>CCL20</b>    | TATATTGTGCGTCTCCTCAG   | GCTATGTCCAATTCCATTCC   |
| <b>AREG</b>     | AAAGAAAGAAAAAGGGAGGC   | CATTTGCATGTTACTGCTTC   |
| <b>LGALS3</b>   | AGATTTCCAAAGAGGGAATG   | AAGTGCAACAATGACTCTC    |
| <b>PLAU</b>     | GAAAACCTCATCCTACACAAG  | ATTCTCTTTTCAAAGCCAG    |
| <b>ANGPTL4</b>  | AGGCAGAGTGGAATTTG      | CCTCCATCTGAGGTCATC     |
| <b>MSLN</b>     | GACGTCCTAAAGCATAAACTG  | TCATCTTGAGGAAGAGGTAG   |
| <b>THBS1</b>    | GTGACTGAAGAGAACAAAGAG  | CAGCTATCAACAGTCCATTC   |
| <b>EPCAM</b>    | GTCTGAGAAGGCTGAGATAAAG | CTTCAAAGATGTCTTCGTCC   |
| <b>DCN</b>      | TTCACGCATTGATTCTTGTC   | GCTGATTCTTGGACAGATAAAG |
| <b>GRN</b>      | GACCTGATCCAGAGTAAGTG   | CATGTCACATTTACATCCC    |
| <b>SYNE2</b>    | GAGAAGATAGAAGAAGCACTC  | TCTTATAGGTTTTCTGCTGC   |
| <b>CBR3</b>     | AGTGAGGTGCTAGTTTCCAAGG | CTGCACATTCTTGTTGACCC   |
| <b>LDLR</b>     | GAGGACAAAGTATTTTGACAG  | GTAGGTTTTTCAGCCAACAAG  |
| <b>PPA2</b>     | CTGGAAGCTACTCTTAATTGG  | GCCTTGTTTTTGAATTCTCC   |
| <b>C1QB</b>     | AACATTAACAACAGCATCCC   | TCATCCTCTGGATAATGACAG  |
| <b>ACTN4</b>    | AGTATGACAAGCTGAGGAAG   | CTGAAAAGGCATGGTAGAAG   |
| <b>CLIC4</b>    | CCCAGAATCAAATCATGCTG   | TCAATTCATCAGGGAGAGG    |
| <b>STIP1</b>    | AACGAGTGTTTTCAGAAAGG   | TATAACCCTTGATGAAGGTCG  |
| <b>PPP1CC</b>   | GAGGTTTATCACCAGATCTTC  | CAGCCTAAGACATGTTTATCG  |
| <b>LCP1</b>     | AAGCTCTGATTGCTCTTTTG   | GAAGTTGCCAATTTTGTTGC   |
| <b>PDAP1</b>    | AAGATGACTACCAGCAAAAG   | CTGCTTCTCAATCTCTTCTC   |
| <b>GSTP1</b>    | GCAAATACATCTCCCTCATC   | GTCTCAAAGGCTTCAGTTG    |
| <b>TPP1</b>     | AATAACCTGACCCTAGAGAATG | CCACATAGTGATGAACTCAG   |
| <b>GCSH</b>     | TTGTTATGAAGATGGTTGGC   | TCTAAGTCTTCTATCCACCAC  |
| <b>S100A7</b>   | TTAGTGCCTGTGACAAAAAG   | GTAGTCTGTGGCTATGTCTC   |
| <b>CTSC</b>     | AACAAACTGGCCATGAAC     | ATAAAGACTCCAGAAGGGAC   |
| <b>NAMPT</b>    | CTAATGGCCTTGGGATTAAC   | TCCAGTGTAACAAAATTCCC   |
| <b>RBM3</b>     | AGTGGCAGGTATTATGACAG   | TCTGCCATTATAGTCTCTGG   |
| <b>PROCR</b>    | CATATGAAGTCTTTGGAGGC   | CATATGGAAGTCTTTGGAGGC  |
| <b>IQGAP1</b>   | ATGCCTTTGACATCATTGAC   | TCTAGGTTTCTGGTAGGACTG  |
| <b>GDF15</b>    | CGAAGACTCCAGATTCCG     | ACTTCTGGCGTGAGTATC     |
| <b>ENO2</b>     | ATGTCCATAGAGAAGATCTGG  | GACACCTTTGCCTAAGTAAC   |
| <b>AZGP1</b>    | ACAGAAATCACAGTCAATGG   | TCCAAGTCTACTCAAGACAG   |
| <b>SERPINE1</b> | ATCCACAGCTGTCATAGTC    | CACTTGGCCCATGAAAAG     |
| <b>DDT</b>      | CCCACTTCTTTGAGTTTCTC   | ATCTCTCTGGAAGAAGCAG    |
| <b>LGMN</b>     | ACTATGATGAGAAGAGGTCC   | GGTGGAGATTGTTTTGTTTC   |
| <b>AXL</b>      | CATGAAACATGGAGACCTAC   | ATCTCTGGTACTCAGATACTC  |
